# Supplementary material for: Electronic structure at coarse-grained resolutions from supervised machine learning
Source: PubMed Central journal article supplement — Sci Adv. 2019 Mar 22;5(3):eaav1190. doi: 10.1126/sciadv.aav1190 (PMC6430626; doi:10.1126/sciadv.aav1190), 2019-03-22
Supplement: aav1190_SM.pdf [file aav1190_SM.pdf]

## Supplementary Materials for

### Electronic structure at coarse-grained resolutions from supervised machine learning

Nicholas E. Jackson, Alec S. Bowen, Lucas W. Antony, Michael A. Webb,  
Venkatram Vishwanath, Juan J. de Pablo\*

\*Corresponding author. Email: depablo@uchicago.edu

Published 22 March 2019, *Sci. Adv.* **5**, eaav1190 (2019)  
DOI: 10.1126/sciadv.aav1190

#### This PDF file includes:

- Fig. S1. Temperature transferability of the ANN-ECG model.
- Fig. S2. ANN-ECG performance versus training data size for 500 K/rigid dataset.
- Fig. S3. Distribution of HOMO energy levels for 300 K/flexible and 300 K/rigid datasets.
- Fig. S4. Atomic numbering scheme used for each 3MT monomer.
- Fig. S5. Delta-machine learning fitting results for ANN-ECG using 300 K/rigid dataset.
- Fig. S6. Application of ANN-ECG to conjugated copolymer PTB7 and non-fullerene acceptor TPB.
- Fig. S7. ANN-ECG results for the HOMO-5→HOMO energy levels of S3MT using 300 K/rigid dataset computed at the BP86/6-31G\* level of theory.
- Table S1. Hyperparameter optimization for ANN layers and neurons.
- Table S2. Hyperparameter optimization for number of training epochs.
- Table S3. Results using ANN-ECG and a systematic coarse-graining strategy.

## ANN-ECG temperature transferability

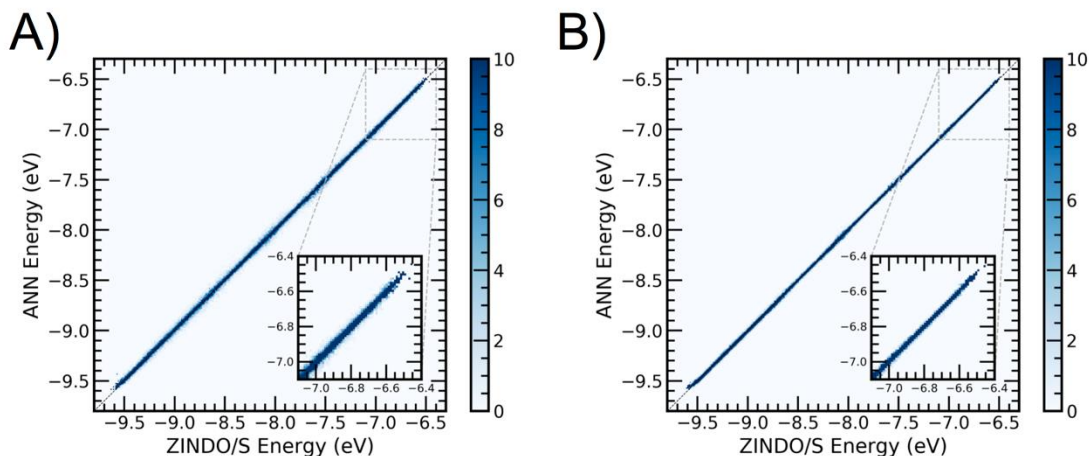

**Fig. S1. Temperature transferability of the ANN-ECG model.** 2D histograms of ANN-ECG performance (A) trained on 300 K/rigid applied to 500 K/rigid and (B) trained on 500 K/rigid applied to 300 K/rigid. Colorbar denotes the probability distribution of predicted HOMO energy levels, and the inset shows the prediction in the interval of the highest-energy HOMO.

## ANN-ECG performance vs. training data size

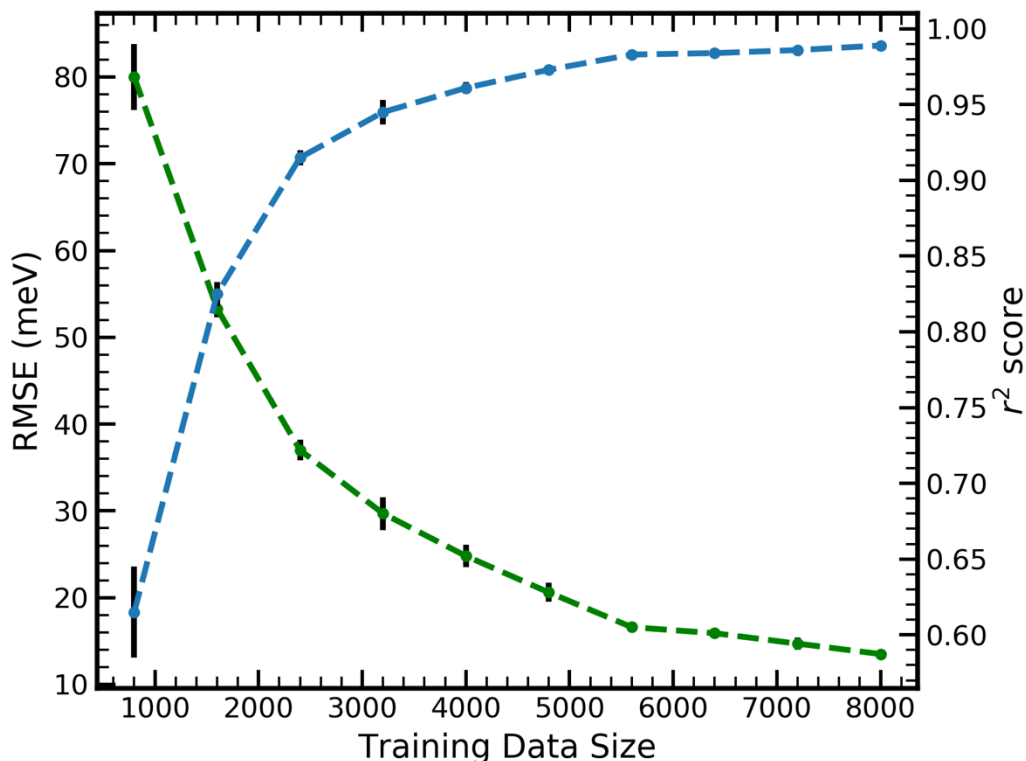

**Fig. S2. ANN-ECG performance versus training data size for 500 K/rigid dataset.** Plot of ANN-ECG performance vs. size of training set for the 500 K/rigid data set of S3MT. RMSE (green) and  $r^2$  (blue) error bars obtained via 5-fold cross-validation applied to a held-out 1,000 configuration validation data set. Error bars represent one standard deviation.

## Tight-binding model fitting parameters

| Temp/Condition | $\epsilon$ (eV) | $t_{i,i+1}$ (eV) |
|----------------|-----------------|------------------|
| 300K/rigid     | -8.0824         | 0.902            |
| 500K/rigid     | -8.0605         | 0.905            |
| 300K/flex      | -8.0418         | 0.890            |
| 500K/flex      | -8.0026         | 0.888            |

## Modified 2-Band tight-binding Hamiltonian results

To explore the accuracy of more complicated tight-binding models, we applied a simplex fitting procedure for a two-band tight-binding model with distinct “middle” and “end” sites. The two bands correspond to the HOMO and HOMO-1 energies for each thiophene monomer. This model includes a total of 7 fitting parameters (4 energies –  $\text{HOMO}_{\text{middle}}$ ,  $\text{HOMO}_{\text{end}}$ ,  $\text{HOMO-1}_{\text{middle}}$ ,  $\text{HOMO-1}_{\text{end}}$ , 3 couplings –  $\text{HOMO}_i\text{-HOMO}_{i+1}$ ,  $\text{HOMO}_i\text{-HOMO-1}_{i+1}$ ,  $\text{HOMO-1}_i\text{-HOMO-1}_{i+1}$ ). All couplings were assumed to be proportional to the cosine of the dihedral angle between neighboring monomers. This tight-binding Hamiltonian was regressed to the 300K/rigid data set. The obtained performance was quantitatively similar to that derived from the simple 1-band tight-binding model. These results obtained a RMSE 54.1 +/- 0.9 meV of and a  $r^2$  of 0.784 +/- 0.001

## Example HOMO energy distributions from ZINDO/S

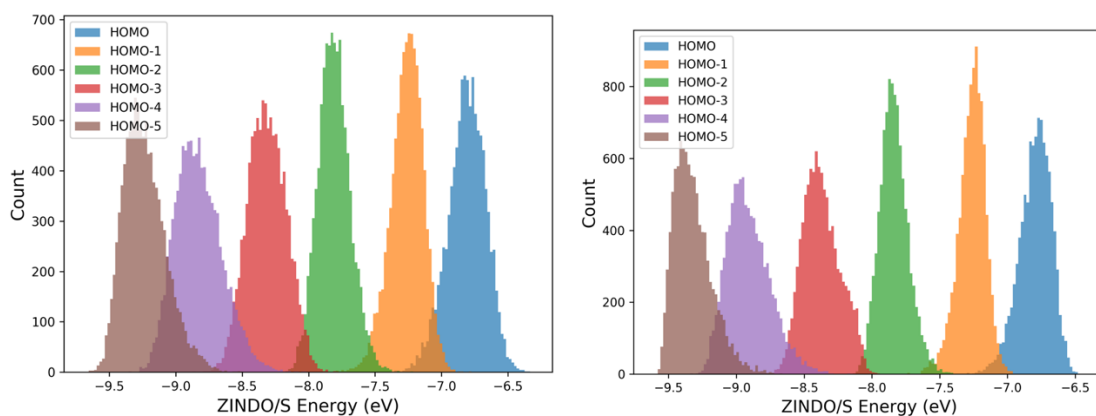

Fig. S3. Distribution of HOMO energy levels for 300 K/flexible and 300 K/rigid datasets.

## Hyperparameter optimizations

We performed a hyperparameter grid search of the number of layers in the ANN, as well as the number of neurons within each layer. Improvements were not observed for more than 2 hidden layers. Performance estimates occurred for 10,000 epochs with 1,000 batch size using 5-fold cross-validated RMSE and  $r^2$  on the 300K/rigid data set using the 3-bead/3MT orthogonal coordinate system monomer mapping.

**Table S1. Hyperparameter optimization for ANN layers and neurons.** We also optimized the number of training epochs as a hyperparameter for the 50,50,50,6 ANN architecture applied to the 300K/rigid data set.

| Layering            | RMSE (meV)  | $r^2$        |
|---------------------|-------------|--------------|
| 40,6                | 31.9        | 0.938        |
| 80,6                | 28.0        | 0.953        |
| 40,10,6             | 28.0        | 0.952        |
| 40,20,6             | 21.1        | 0.972        |
| 40,40,6             | 19.3        | 0.977        |
| 80,40,6             | 17.1        | 0.982        |
| 40,40,20,6          | 16.5        | 0.983        |
| 40,40,40,6          | 15.6        | 0.985        |
| <b>50,50,50,6</b>   | <b>15.3</b> | <b>0.985</b> |
| 30,30,30,6          | 17.1        | 0.982        |
| 60,60,60,6          | 18.6        | 0.978        |
| 30,30,30,30,6       | 16.5        | 0.983        |
| 35,35,35,35,6       | 16.1        | 0.984        |
| 40,40,40,40,6       | 17.1        | 0.981        |
| 45,45,45,45,6       | 16.6        | 0.981        |
| 40,40,30,20,16,12,6 | 16.8        | 0.982        |

**Table S2. Hyperparameter optimization for number of training epochs.** We also tested various dropout regularization percentages applied to all hidden layers, but results were inferior to those using a smaller network size without dropout regularization.

| Epochs | RMSE (meV) | $r^2$ |
|--------|------------|-------|
| 2000   | 21.1       | 0.972 |
| 5000   | 18.5       | 0.978 |
| 8000   | 17.2       | 0.981 |
| 10000  | 15.3       | 0.985 |
| 20000  | 15.1       | 0.986 |
| 50000  | 14.6       | 0.987 |
| 100000 | 13.5       | 0.989 |

The normal initialization, Nesterov-accelerated ADAM optimization, the exponential linear unit activation function, batch normalization, and L2-norm weight restriction were all taken as recommended default ANN regression settings from Sebastian Raschka, *Python Machine Learning*, 2<sup>nd</sup> Edition, ISBN-10: 1787125939.

#### Coarse-grained mappings for main-text Figure 4

Coarse-grained mappings were generated using graph-based coarse-graining (Ref. 27 of main text) with 7 iterations of spectral grouping. Using the number scheme for 3MT shown in fig. S4, the coarse-grained resolution in the main-text of Figure 4 correspond to the following atomic groupings for each monomer:

- 0 – [[1],[2],[3],[4],[5],[6],[7],[8],[9],[10]] – atomistic resolution
- 1 – [[1],[2],[3],[4,6],[5],[7,8,9,10]] – united atom resolution
- 2 – [[1],[2],[4,6],[5],[3,7,8,9,10]]

- 3 – [[1],[2],[4,5,6],[3,7,8,9,10]]
- 4 – [[1,2],[4,5,6],[3,7,8,9,10]]
- 5 – [[1,2],[3,4,5,6,7,8,9,10]]
- 6 – [[1,2,3,4,5,6,7,8,9,10]]
- 7 – 1 bead at COM of every two 3MT monomers.
- 8 – One bead at COM of entire S3MT

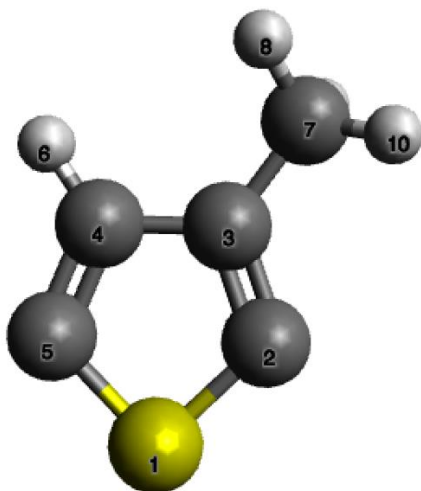

**Fig. S4. Atomic numbering scheme used for each 3MT monomer.**

#### Cross-validated results for main-text Figure 4

To check the dependence of the learned values on we perform a grid search at every level of resolution through the following parameter space `neurons_per_layer = [10,20,30,40,50,60]`, `num_layers = [1,2,3,4]`, `initializers=['he_normal','lecun_normal']`, `opt=['Adam','NAdam','rmsprop']`. These errors are compared to that using the [50,50,50,6] ANN hyperparameters.

**Table S3. Results using ANN-ECG and a systematic coarse-graining strategy.** Corresponds directly to data plotted in main-text Figure 5 (A). HP Opt = Hyperparameter optimization for each resolution.

| Method      | Dataset        | RMSE (meV) | R <sup>2</sup> | RMSE (HP Opt) | R <sup>2</sup> (HP Opt) |
|-------------|----------------|------------|----------------|---------------|-------------------------|
| ANN – Res 0 | 300 K/flexible | 47.0       | 0.89           | 41.0          | 0.918                   |
| ANN – Res 1 | 300 K/flexible | 41.0       | 0.918          | 37.9          | 0.930                   |
| ANN – Res 2 | 300 K/flexible | 61.0       | 0.809          | 56.2          | 0.841                   |
| ANN – Res 3 | 300 K/flexible | 70.0       | 0.748          | 66.2          | 0.775                   |
| ANN – Res 4 | 300 K/flexible | 74.0       | 0.721          | 71.0          | 0.745                   |
| ANN – Res 5 | 300 K/flexible | 76.0       | 0.713          | 73.1          | 0.731                   |
| ANN – Res 6 | 300 K/flexible | 130.0      | 0.193          | 128.6         | 0.21                    |
| ANN – Res 7 | 300 K/flexible | 139.0      | 0.073          | 139.0         | 0.078                   |
| ANN – Res 8 | 300 K/flexible | 148.0      | -0.042         | 146.0         | 0.0                     |

### Delta-ML approach to S3MT HOMO band energies

To compute a delta-ML style prediction, we utilize the fitting parameters from the 300K rigid tight-binding model to find the difference between the ZINDO/S predicted energies and that of the fitted tight-binding result. This difference is then directly regressed to the distance matrix of the coarse-grained coordinates.

Delta-ML approach achieves a 5-fold cross-validated RMSE of 17.3 +/- 0.001 meV, and a  $r^2$  score of 0.876 +/- 0.001 on the 300K rigid data set. This makes the delta-ML approach comparable, though slightly worse, than the direct regression of the electronic structure from the coarse-grained coordinates. This is consistent with the interpretation that the best performance is achieved when the ANN can apply a non-linear transformation to the completely generalized input feature, as opposed to introducing an additional potential bias to the energies via subtraction of the tight-binding model predictions.

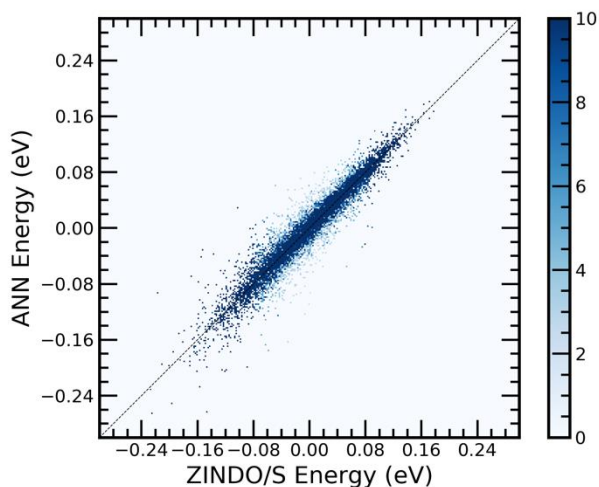

**Fig. S5. Delta-machine learning fitting results for ANN-ECG using 300 K/rigid dataset.**

### Applications of ANN-ECG to other chemical species

To demonstrate the utility of ANN-ECG applied to a variety of conjugated chemical species with differing molecular geometries, we have applied ANN-ECG to a high-performance donor-acceptor conjugated copolymer, PTB7, and a complex non-fullerene acceptor, TPB. We utilize the same rigid monomer approach for PTB7, akin to that for S3MT in the main text, sampling 10,000 configurations at 10 ps intervals taken at 300K. We also use the same 3-bead/monomer mapping as for S3MT. For TPB we apply a rigid monomer approach to all conjugated rings, and select a CG mapping using the graph-based algorithm referenced in the main text with four iterations of spectral grouping. 10,000 configurations are drawn from 1000K MD simulations in an attempt to escape kinetic traps associated with the large perylenediimide units. The TPB mapping is shown, along with the results, in fig. S6B, and represents a reduction of the 352 bead atomistic system to 13 CG beads.

For PTB7, we instead regress both the valence and conduction band energies, specifically the HOMO-2, HOMO-1, HOMO, LUMO, LUMO+1, and LUMO+2 energies simultaneously. For PTB7 we achieve a 5-fold cross-validated RMSE of 4.8 +/- 0.3 and a  $R^2$  of 0.989 +/- 0.001 using the same ANN hyperparameters as used for the single molecule S3MT results.

For TPB, we regress the four lowest-lying LUMO energy levels of PTB to the 13 CG bead representation, obtaining a 5-fold cross-validated RMSE of 26.2 +/- 0.4 meV and R2 of 0.610 +/- 0.002 using a [20,20,4] ANN configuration with a batch size of 32, obtained via a grid search hyperparameter optimization.

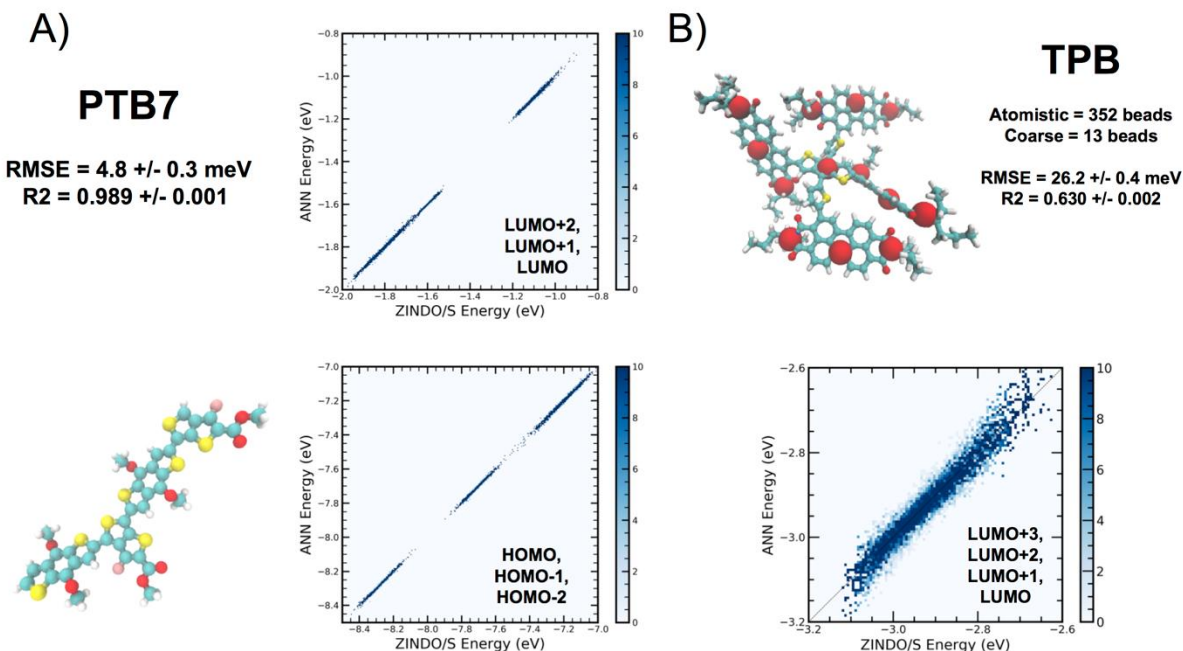

**Fig. S6.** Application of ANN-ECG to A) conjugated copolymer PTB7 and B) non-fullerene acceptor TPB.

### ANN-ECG HOMO prediction at the density functional theory level

To demonstrate the utility of ANN-ECG to more advanced electronic structure methods, we have computed the six highest HOMO energies of S3MT at the BP86/def2-SVP level of DFT theory. Due to the explicit inclusion of all non-local Coulomb and exchange integrals, the entire coarse-grained distance matrix obtains the highest accuracy predictions, as opposed to simply the nearest neighbor CG distances used in the main text. We find that hyperparameter optimization leads to superior cross-validated accuracy when an additional 50 neuron layer is added to the ANN structure of the main text, and ‘lecun\_normal’ initialization is used instead of ‘he\_normal’. This achieves a 5-fold cross-validated RMSE error of 11.1 +/- 0.4 meV and a R2 of 0.94 on the 300K/rigid dataset.

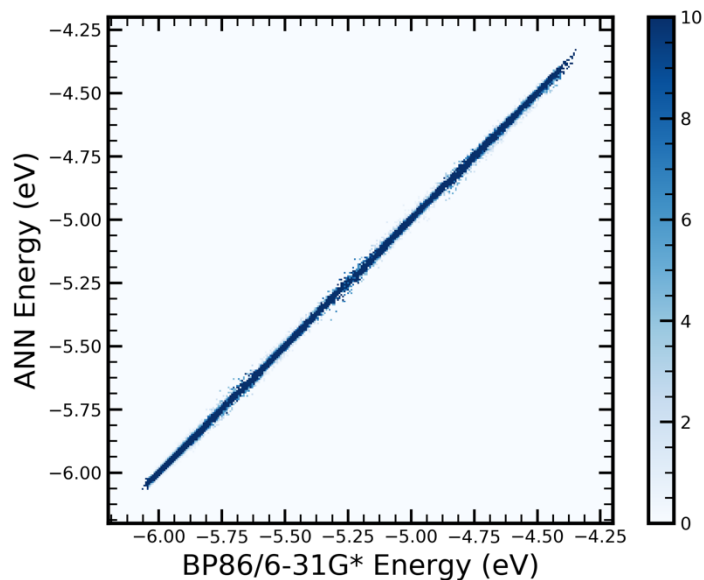

**Fig. S7. ANN-ECG results for the HOMO-5→HOMO energy levels of S3MT using 300 K/rigid dataset computed at the BP86/6-31G\* level of theory.**

### Example input file and data file for 300K/rigid MD simulation in LAMMPS

**Input file:**

```

units real
atom_style full
pair_style lj/cut/coul/cut 20.0 20.0
bond_style harmonic
angle_style harmonic
dihedral_style opls
pair_modify mix arithmetic
special_bonds lj/coul 0.0 0.0 0.5

# ----- Atom Definition Section -----

read_data "box_of_P3MT_poly6.data"

# ----- Setting Section -----

#Non-bonded interactions (pair-wise)
#pair_coeff atomType1 atomType2 eps(kcal/mol) sigma (ang)
pair_coeff 1 1 0.250000 3.550000
pair_coeff 1 2 0.132288 3.550000
pair_coeff 1 3 0.132288 3.550000
pair_coeff 1 4 0.132288 3.550000
pair_coeff 1 5 0.132288 3.550000
pair_coeff 1 6 0.086603 2.931041
pair_coeff 1 7 0.132288 3.550000
pair_coeff 1 8 0.086603 2.979094
pair_coeff 1 9 0.086603 2.931041
pair_coeff 2 2 0.070000 3.550000
pair_coeff 2 3 0.070000 3.550000
pair_coeff 2 4 0.070000 3.550000
pair_coeff 2 5 0.070000 3.550000
pair_coeff 2 6 0.045826 2.931041
pair_coeff 2 7 0.070000 3.550000
pair_coeff 2 8 0.045826 2.979094
pair_coeff 2 9 0.045826 2.931041
pair_coeff 3 3 0.070000 3.550000
pair_coeff 3 4 0.070000 3.550000
pair_coeff 3 5 0.070000 3.550000

```



pair\_coeff 3 6 0.045826 2.931041  
pair\_coeff 3 7 0.070000 3.550000  
pair\_coeff 3 8 0.045826 2.979094  
pair\_coeff 3 9 0.045826 2.931041  
pair\_coeff 4 4 0.070000 3.550000  
pair\_coeff 4 5 0.070000 3.550000  
pair\_coeff 4 6 0.045826 2.931041  
pair\_coeff 4 7 0.070000 3.550000  
pair\_coeff 4 8 0.045826 2.979094  
pair\_coeff 4 9 0.045826 2.931041  
pair\_coeff 5 5 0.070000 3.550000  
pair\_coeff 5 6 0.045826 2.931041  
pair\_coeff 5 7 0.070000 3.550000  
pair\_coeff 5 8 0.045826 2.979094  
pair\_coeff 5 9 0.045826 2.931041  
pair\_coeff 6 6 0.030000 2.420000  
pair\_coeff 6 7 0.045826 2.931041  
pair\_coeff 6 8 0.030000 2.459675  
pair\_coeff 6 9 0.030000 2.420000  
pair\_coeff 7 7 0.070000 3.550000  
pair\_coeff 7 8 0.045826 2.979094  
pair\_coeff 7 9 0.045826 2.931041  
pair\_coeff 8 8 0.030000 2.500000  
pair\_coeff 8 9 0.030000 2.459675  
pair\_coeff 9 9 0.030000 2.420000

#### #Stretching Interactions

#bond\_coeff bondtype k (kcal/mol ang<sup>-2</sup>) R0 (ang)

bond\_coeff 1 250.0 1.7580  
bond\_coeff 2 250.0 1.7500  
bond\_coeff 3 546.0 1.3860  
bond\_coeff 4 546.0 1.4540  
bond\_coeff 5 546.0 1.4280  
bond\_coeff 6 317.0 1.5080  
bond\_coeff 7 546.0 1.3780  
bond\_coeff 8 367.0 1.0800  
bond\_coeff 9 367.0 1.0800  
bond\_coeff 10 340.0 1.0900  
bond\_coeff 11 367.0 1.0800

#### #Standard 3-body bending interactions

#angle\_coeff angletype k (kcal/mol rad<sup>-2</sup>) Theta\_0 (degrees)

angle\_coeff 1 74.0 92.100  
angle\_coeff 2 70.0 111.000  
angle\_coeff 3 70.0 118.400  
angle\_coeff 4 70.0 131.100  
angle\_coeff 5 70.0 112.000  
angle\_coeff 6 70.0 125.600  
angle\_coeff 7 70.0 122.400  
angle\_coeff 8 70.0 114.800  
angle\_coeff 9 35.0 132.100  
angle\_coeff 10 35.0 125.700  
angle\_coeff 11 70.0 110.000  
angle\_coeff 12 35.0 121.600  
angle\_coeff 13 35.0 120.000  
angle\_coeff 14 35.0 109.500  
angle\_coeff 15 33.0 107.800  
angle\_coeff 16 70.0 123.100  
angle\_coeff 17 70.0 127.500  
angle\_coeff 18 35.0 121.600  
angle\_coeff 19 35.0 120.000

#### #Dihedral twisting interactions

#dihedral\_coeff dihedral\_type V1 V2 V3 V4

dihedral\_coeff 1 0 3.050 0 0  
dihedral\_coeff 2 0 3.050 0 0  
dihedral\_coeff 3 0 2.800 0 0  
dihedral\_coeff 4 0 2.800 0 0  
dihedral\_coeff 5 0 7.250 0 0  
dihedral\_coeff 6 0 7.250 0 0  
dihedral\_coeff 7 0 7.250 0 0  
dihedral\_coeff 8 0 7.250 0 0  
dihedral\_coeff 9 0 0 0 0  
dihedral\_coeff 10 0 0 0 0

```
dihedral_coeff 11 1.674 3.438 -0.126 -0.035
dihedral_coeff 12 0 0 0
dihedral_coeff 13 0 7.250 0 0
dihedral_coeff 14 0 7.250 0 0
dihedral_coeff 15 0 7.250 0 0
dihedral_coeff 16 0 7.250 0 0
dihedral_coeff 17 0 0 0 0
dihedral_coeff 18 0 0 0 0
dihedral_coeff 19 0 7.250 0 0
dihedral_coeff 20 0 7.250 0 0
dihedral_coeff 21 0 7.250 0 0
dihedral_coeff 22 0 7.250 0 0
dihedral_coeff 23 0 2.800 0 0
dihedral_coeff 24 0 7.250 0 0
dihedral_coeff 25 0 7.250 0 0
dihedral_coeff 26 0 3.050 0 0
dihedral_coeff 27 0 7.250 0 0
dihedral_coeff 28 0 7.250 0 0
```

```
# ----- Run Section -----
```

```
timestep 1
thermo 100
thermo_style custom step temp press vol etotal ke pe ebond eangle edihed eimp evdwl ecoutl elong density
neigh_modify delay 0 every 1 check yes page 1000000 one 100000
```

```
group mono1 id 1 2 3 4 5 6 7 8 9 10 61
group mono2 id 11 12 13 14 15 16 17 18 19 20
group mono3 id 21 22 23 24 25 26 27 28 29 30
group mono4 id 31 32 33 34 35 36 37 38 39 40
group mono5 id 41 42 43 44 45 46 47 48 49 50
group mono6 id 51 52 53 54 55 56 57 58 59 60 62
```

```
minimize 1.0e-6 1.0e-6 20000 200000
```

```
#SIMULATION (nPT for 6 ns; 100 ps snapshots)
```

```
fix 1 all nve
fix 4 all rigid group 6 mono1 mono2 mono3 mono4 mono5 mono6 langevin 300.0 600.0 100.0 908246
run 2000000
unfix 4
```

```
fix 1 all nve
fix 4 all rigid group 6 mono1 mono2 mono3 mono4 mono5 mono6 langevin 600.0 300.0 100.0 239085
run 2000000
unfix 4
```

```
fix 1 all nve
fix 4 all rigid group 6 mono1 mono2 mono3 mono4 mono5 mono6 langevin 300.0 300.0 100.0 114675
dump 5 all custom 10000 300K_rigid.trj id mass xu yu zu
dump_modify 5 sort id
run 100000000
undump 5
unfix 4
```

#### Data file:

```
LAMMPS Description
```

```
62 atoms
67 bonds
114 angles
152 dihedrals
0 impropers
```

```
9 atom types
11 bond types
19 angle types
28 dihedral types
0 improper types
```

```
0.0 200.0 xlo xhi
0.0 200.0 ylo yhi
0.0 200.0 zlo zhi
```

Masses

|   |        |
|---|--------|
| 1 | 32.060 |
| 2 | 12.011 |
| 3 | 12.011 |
| 4 | 12.011 |
| 5 | 12.011 |
| 6 | 1.008  |
| 7 | 12.011 |
| 8 | 1.008  |
| 9 | 1.008  |

Atoms

|        |         |           |           |            |
|--------|---------|-----------|-----------|------------|
| 1 1 1  | -0.0532 | 13.175292 | 12.394046 | 16.539779  |
| 2 1 2  | -0.0538 | 13.065773 | 11.741970 | 15.016071  |
| 3 1 3  | -0.0563 | 14.111187 | 10.790127 | 14.924545  |
| 4 1 4  | -0.2190 | 14.883995 | 10.704413 | 16.122841  |
| 5 1 5  | 0.0361  | 14.472056 | 11.560086 | 17.147127  |
| 6 1 6  | 0.1611  | 15.723157 | 10.030672 | 16.237666  |
| 7 1 7  | 0.0051  | 14.449889 | 9.926859  | 13.733491  |
| 8 1 8  | 0.0600  | 14.442781 | 8.860565  | 14.047196  |
| 9 1 8  | 0.0600  | 13.711254 | 10.024151 | 12.929799  |
| 10 1 8 | 0.0600  | 15.819838 | 10.307650 | 13.156303  |
| 11 1 1 | -0.0532 | 11.909972 | 12.407178 | 12.518483  |
| 12 1 2 | -0.0538 | 10.752764 | 13.598494 | 12.495791  |
| 13 1 3 | -0.0563 | 10.401541 | 13.825068 | 13.849521  |
| 14 1 4 | -0.2190 | 11.128277 | 12.991456 | 14.753643  |
| 15 1 5 | 0.0361  | 12.036997 | 12.122020 | 14.145907  |
| 16 1 6 | 0.1611  | 10.993373 | 13.025628 | 15.826927  |
| 17 1 7 | 0.0051  | 9.380459  | 14.807869 | 14.369187  |
| 18 1 8 | 0.0600  | 9.869789  | 15.480301 | 15.106640  |
| 19 1 8 | 0.0600  | 8.982045  | 15.448299 | 13.574150  |
| 20 1 8 | 0.0600  | 8.196869  | 14.074312 | 15.014101  |
| 21 1 1 | -0.0532 | 8.303811  | 14.450824 | 10.943598  |
| 22 1 2 | -0.0538 | 8.556672  | 14.149042 | 9.329947   |
| 23 1 3 | -0.0563 | 9.851994  | 13.582378 | 9.238792   |
| 24 1 4 | -0.2190 | 10.489606 | 13.459060 | 10.5111087 |
| 25 1 5 | 0.0361  | 9.729996  | 13.911449 | 11.592462  |
| 26 1 6 | 0.1611  | 11.482286 | 13.046670 | 10.636886  |
| 27 1 7 | 0.0051  | 10.561399 | 13.138806 | 7.982389   |
| 28 1 8 | 0.0600  | 10.858823 | 12.073567 | 8.093063   |
| 29 1 8 | 0.0600  | 9.913245  | 13.195357 | 7.100535   |
| 30 1 8 | 0.0600  | 11.792297 | 14.014809 | 7.713283   |
| 31 1 1 | -0.0532 | 7.681158  | 15.489409 | 6.938426   |
| 32 1 2 | -0.0538 | 6.216335  | 16.272445 | 6.943886   |
| 33 1 3 | -0.0563 | 5.679154  | 16.083030 | 8.241128   |
| 34 1 4 | -0.2190 | 6.537625  | 15.314608 | 9.085549   |
| 35 1 5 | 0.0361  | 7.729219  | 14.899795 | 8.486328   |
| 36 1 6 | 0.1611  | 6.292996  | 15.070084 | 10.111060  |
| 37 1 7 | 0.0051  | 4.354578  | 16.590736 | 8.757164   |
| 38 1 8 | 0.0600  | 4.531923  | 17.194624 | 9.673304   |
| 39 1 8 | 0.0600  | 3.855984  | 17.249230 | 8.036915   |
| 40 1 8 | 0.0600  | 3.403815  | 15.424478 | 9.058495   |
| 41 1 1 | -0.0532 | 4.331164  | 17.226751 | 5.059280   |
| 42 1 2 | -0.0538 | 4.824928  | 17.375382 | 3.480361   |
| 43 1 3 | -0.0563 | 6.235035  | 17.239358 | 3.499618   |
| 44 1 4 | -0.2190 | 6.749489  | 17.025795 | 4.814995   |
| 45 1 5 | 0.0361  | 5.782789  | 16.989882 | 5.822584   |
| 46 1 6 | 0.1611  | 7.803840  | 16.898620 | 5.023512   |
| 47 1 7 | 0.0051  | 7.168938  | 17.307829 | 2.315684   |
| 48 1 8 | 0.0600  | 7.773682  | 16.375959 | 2.278955   |
| 49 1 8 | 0.0600  | 6.626772  | 17.369693 | 1.365319   |
| 50 1 8 | 0.0600  | 8.082275  | 18.537213 | 2.412316   |
| 51 1 1 | -0.0532 | 4.273688  | 19.014616 | 1.002016   |
| 52 1 2 | -0.0538 | 2.644030  | 19.322597 | 0.911209   |
| 53 1 3 | -0.0563 | 2.067694  | 18.704615 | 2.048403   |
| 54 1 4 | -0.2190 | 3.035960  | 18.047990 | 2.868035   |
| 55 1 5 | 0.0361  | 4.350821  | 18.136194 | 2.405006   |
| 56 1 6 | 0.1611  | 2.780113  | 17.522809 | 3.779096   |
| 57 1 7 | 0.0051  | 0.606337  | 18.683221 | 2.425944   |
| 58 1 8 | 0.0600  | 0.492961  | 19.094091 | 3.452480   |
| 59 1 8 | 0.0600  | 0.000061  | 19.313229 | 1.765272   |

60 1 8 0.0600 0.045532 17.256627 2.353589  
61 1 9 0.0000 14.837795 10.973175 17.976687  
62 1 9 0.0000 2.278292 19.909509 0.081649

**Bonds**

1 1 1 2  
2 2 1 5  
3 3 2 3  
4 4 2 15  
5 5 3 4  
6 6 3 7  
7 7 4 5  
8 8 4 6  
9 9 5 61  
10 10 7 8  
11 10 7 9  
12 10 7 10  
13 1 11 12  
14 2 11 15  
15 3 12 13  
16 4 12 25  
17 5 13 14  
18 6 13 17  
19 7 14 15  
20 8 14 16  
21 10 17 18  
22 10 17 19  
23 10 17 20  
24 1 21 22  
25 2 21 25  
26 3 22 23  
27 4 22 35  
28 5 23 24  
29 6 23 27  
30 7 24 25  
31 8 24 26  
32 10 27 28  
33 10 27 29  
34 10 27 30  
35 1 31 32  
36 2 31 35  
37 3 32 33  
38 4 32 45  
39 5 33 34  
40 6 33 37  
41 7 34 35  
42 8 34 36  
43 10 37 38  
44 10 37 39  
45 10 37 40  
46 1 41 42  
47 2 41 45  
48 3 42 43  
49 4 42 55  
50 5 43 44  
51 6 43 47  
52 7 44 45  
53 8 44 46  
54 10 47 48  
55 10 47 49  
56 10 47 50  
57 1 51 52  
58 2 51 55  
59 3 52 53  
60 11 52 62  
61 5 53 54  
62 6 53 57  
63 7 54 55  
64 8 54 56  
65 10 57 58  
66 10 57 59  
67 10 57 60

## Angles

1 1 2 1 5  
2 2 1 2 3  
3 3 1 2 15  
4 4 3 2 15  
5 5 2 3 4  
6 6 2 3 7  
7 7 4 3 7  
8 8 3 4 5  
9 9 3 4 6  
10 10 5 4 6  
11 11 1 5 4  
12 12 1 5 61  
13 13 4 5 61  
14 14 3 7 8  
15 14 3 7 9  
16 14 3 7 10  
17 15 8 7 9  
18 15 8 7 10  
19 15 9 7 10  
20 1 12 11 15  
21 2 11 12 13  
22 3 11 12 25  
23 4 13 12 25  
24 5 12 13 14  
25 6 12 13 17  
26 7 14 13 17  
27 8 13 14 15  
28 9 13 14 16  
29 10 15 14 16  
30 16 2 15 11  
31 17 2 15 14  
32 11 11 15 14  
33 14 13 17 18  
34 14 13 17 19  
35 14 13 17 20  
36 15 18 17 19  
37 15 18 17 20  
38 15 19 17 20  
39 1 22 21 25  
40 2 21 22 23  
41 3 21 22 35  
42 4 23 22 35  
43 5 22 23 24  
44 6 22 23 27  
45 7 24 23 27  
46 8 23 24 25  
47 9 23 24 26  
48 10 25 24 26  
49 16 12 25 21  
50 17 12 25 24  
51 11 21 25 24  
52 14 23 27 28  
53 14 23 27 29  
54 14 23 27 30  
55 15 28 27 29  
56 15 28 27 30  
57 15 29 27 30  
58 1 32 31 35  
59 2 31 32 33  
60 3 31 32 45  
61 4 33 32 45  
62 5 32 33 34  
63 6 32 33 37  
64 7 34 33 37  
65 8 33 34 35  
66 9 33 34 36  
67 10 35 34 36  
68 16 22 35 31  
69 17 22 35 34  
70 11 31 35 34  
71 14 33 37 38  
72 14 33 37 39

73 14 33 37 40  
74 15 38 37 39  
75 15 38 37 40  
76 15 39 37 40  
77 1 42 41 45  
78 2 41 42 43  
79 3 41 42 55  
80 4 43 42 55  
81 5 42 43 44  
82 6 42 43 47  
83 7 44 43 47  
84 8 43 44 45  
85 9 43 44 46  
86 10 45 44 46  
87 16 32 45 41  
88 17 32 45 44  
89 11 41 45 44  
90 14 43 47 48  
91 14 43 47 49  
92 14 43 47 50  
93 15 48 47 49  
94 15 48 47 50  
95 15 49 47 50  
96 1 52 51 55  
97 2 51 52 53  
98 18 51 52 62  
99 19 53 52 62  
100 5 52 53 54  
101 6 52 53 57  
102 7 54 53 57  
103 8 53 54 55  
104 9 53 54 56  
105 10 55 54 56  
106 16 42 55 51  
107 17 42 55 54  
108 11 51 55 54  
109 14 53 57 58  
110 14 53 57 59  
111 14 53 57 60  
112 15 58 57 59  
113 15 58 57 60  
114 15 59 57 60

#### Dihedrals

1 1 5 1 2 3  
2 2 5 1 2 15  
3 3 2 1 5 4  
4 4 2 1 5 61  
5 5 1 2 3 4  
6 6 1 2 3 7  
7 7 15 2 3 4  
8 8 15 2 3 7  
9 9 1 2 15 11  
10 10 1 2 15 14  
11 11 3 2 15 11  
12 12 3 2 15 14  
13 13 2 3 4 5  
14 14 2 3 4 6  
15 15 7 3 4 5  
16 16 7 3 4 6  
17 17 2 3 7 8  
18 17 2 3 7 9  
19 17 2 3 7 10  
20 18 4 3 7 8  
21 18 4 3 7 9  
22 18 4 3 7 10  
23 19 3 4 5 1  
24 20 3 4 5 61  
25 21 6 4 5 1  
26 22 6 4 5 61  
27 1 15 11 12 13  
28 2 15 11 12 25  
29 23 12 11 15 2

30 3 12 11 15 14  
31 5 11 12 13 14  
32 6 11 12 13 17  
33 7 25 12 13 14  
34 8 25 12 13 17  
35 9 11 12 25 21  
36 10 11 12 25 24  
37 11 13 12 25 21  
38 12 13 12 25 24  
39 13 12 13 14 15  
40 14 12 13 14 16  
41 15 17 13 14 15  
42 16 17 13 14 16  
43 17 12 13 17 18  
44 17 12 13 17 19  
45 17 12 13 17 20  
46 18 14 13 17 18  
47 18 14 13 17 19  
48 18 14 13 17 20  
49 24 13 14 15 2  
50 19 13 14 15 11  
51 25 16 14 15 2  
52 21 16 14 15 11  
53 1 25 21 22 23  
54 2 25 21 22 35  
55 23 22 21 25 12  
56 3 22 21 25 24  
57 5 21 22 23 24  
58 6 21 22 23 27  
59 7 35 22 23 24  
60 8 35 22 23 27  
61 9 21 22 35 31  
62 10 21 22 35 34  
63 11 23 22 35 31  
64 12 23 22 35 34  
65 13 22 23 24 25  
66 14 22 23 24 26  
67 15 27 23 24 25  
68 16 27 23 24 26  
69 17 22 23 27 28  
70 17 22 23 27 29  
71 17 22 23 27 30  
72 18 24 23 27 28  
73 18 24 23 27 29  
74 18 24 23 27 30  
75 24 23 24 25 12  
76 19 23 24 25 21  
77 25 26 24 25 12  
78 21 26 24 25 21  
79 1 35 31 32 33  
80 2 35 31 32 45  
81 23 32 31 35 22  
82 3 32 31 35 34  
83 5 31 32 33 34  
84 6 31 32 33 37  
85 7 45 32 33 34  
86 8 45 32 33 37  
87 9 31 32 45 41  
88 10 31 32 45 44  
89 11 33 32 45 41  
90 12 33 32 45 44  
91 13 32 33 34 35  
92 14 32 33 34 36  
93 15 37 33 34 35  
94 16 37 33 34 36  
95 17 32 33 37 38  
96 17 32 33 37 39  
97 17 32 33 37 40  
98 18 34 33 37 38  
99 18 34 33 37 39  
100 18 34 33 37 40  
101 24 33 34 35 22  
102 19 33 34 35 31  
103 25 36 34 35 22

104 21 36 34 35 31  
105 1 45 41 42 43  
106 2 45 41 42 55  
107 23 42 41 45 32  
108 3 42 41 45 44  
109 5 41 42 43 44  
110 6 41 42 43 47  
111 7 55 42 43 44  
112 8 55 42 43 47  
113 9 41 42 55 51  
114 10 41 42 55 54  
115 11 43 42 55 51  
116 12 43 42 55 54  
117 13 42 43 44 45  
118 14 42 43 44 46  
119 15 47 43 44 45  
120 16 47 43 44 46  
121 17 42 43 47 48  
122 17 42 43 47 49  
123 17 42 43 47 50  
124 18 44 43 47 48  
125 18 44 43 47 49  
126 18 44 43 47 50  
127 24 43 44 45 32  
128 19 43 44 45 41  
129 25 46 44 45 32  
130 21 46 44 45 41  
131 1 55 51 52 53  
132 26 55 51 52 62  
133 23 52 51 55 42  
134 3 52 51 55 54  
135 5 51 52 53 54  
136 6 51 52 53 57  
137 27 62 52 53 54  
138 28 62 52 53 57  
139 13 52 53 54 55  
140 14 52 53 54 56  
141 15 57 53 54 55  
142 16 57 53 54 56  
143 17 52 53 57 58  
144 17 52 53 57 59  
145 17 52 53 57 60  
146 18 54 53 57 58  
147 18 54 53 57 59  
148 18 54 53 57 60  
149 24 53 54 55 42  
150 19 53 54 55 51  
151 25 56 54 55 42  
152 21 56 54 55 51

## Example ORCA script for electronic structure calculation

```
#  
!RHF ZINDO/S TightSCF  
  
* xyz 0 1  
S 10.3218 17.1691 23.3159  
C 9.51226 17.054 21.7579  
C 8.31465 17.763 21.7721  
C 8.07348 18.4161 23.0221  
C 9.06475 18.1962 23.9525  
H 7.22119 19.0296 23.2749  
C 7.3402 17.8827 20.6213  
H 6.65105 18.7126 20.7796  
H 7.87279 18.0572 19.6862  
H 6.75726 16.9669 20.5231  
S 11.8957 16.2049 20.4419  
C 11.749 15.3394 18.921  
C 10.4116 15.2021 18.5695  
C 9.52567 15.7728 19.5368  
C 10.1618 16.3688 20.6072  
H 8.44664 15.771 19.4855  
C 9.88493 14.5171 17.328  
H 8.82294 14.2916 17.4284
```



|   |         |         |         |
|---|---------|---------|---------|
| H | 10.0182 | 15.1589 | 16.4571 |
| H | 10.4157 | 13.5808 | 17.154  |
| S | 14.0645 | 13.7571 | 18.5339 |
| C | 14.9366 | 13.9429 | 17.021  |
| C | 14.3365 | 14.9186 | 16.2339 |
| C | 13.2024 | 15.5177 | 16.8672 |
| C | 12.9073 | 14.9993 | 18.1121 |
| H | 12.5915 | 16.3074 | 16.4548 |
| C | 14.7954 | 15.3613 | 14.8622 |
| H | 14.34   | 16.3131 | 14.5877 |
| H | 15.8784 | 15.4854 | 14.8432 |
| H | 14.5173 | 14.6199 | 14.113  |
| S | 16.1664 | 11.4771 | 17.38   |
| C | 17.9057 | 11.328  | 17.1886 |
| C | 18.4526 | 12.5403 | 16.785  |
| C | 17.4734 | 13.5769 | 16.6727 |
| C | 16.1873 | 13.1801 | 16.98   |
| H | 17.665  | 14.598  | 16.3769 |
| C | 19.9131 | 12.8048 | 16.4936 |
| H | 20.1169 | 13.8756 | 16.4659 |
| H | 20.5433 | 12.3593 | 17.2636 |
| H | 20.1891 | 12.3787 | 15.529  |
| S | 18.0552 | 8.55975 | 17.3369 |
| C | 19.2143 | 7.82535 | 18.4327 |
| C | 20.018  | 8.80102 | 19.0101 |
| C | 19.6672 | 10.1232 | 18.592  |
| C | 18.612  | 10.1774 | 17.7034 |
| H | 20.1508 | 11.0356 | 18.9091 |
| C | 21.1461 | 8.55976 | 19.9885 |
| H | 21.419  | 9.48157 | 20.5029 |
| H | 20.8505 | 7.82696 | 20.7395 |
| H | 22.0263 | 8.18573 | 19.4654 |
| S | 17.9505 | 5.30647 | 18.0435 |
| C | 18.9171 | 3.86173 | 18.2476 |
| C | 20.2336 | 4.16852 | 18.5469 |
| C | 20.4544 | 5.57957 | 18.6188 |
| C | 19.3237 | 6.34174 | 18.389  |
| H | 21.3974 | 6.06225 | 18.8302 |
| C | 21.3414 | 3.1674  | 18.7759 |
| H | 21.6673 | 3.19645 | 19.8158 |
| H | 21.0037 | 2.15585 | 18.5489 |
| H | 22.1964 | 3.39507 | 18.139  |
| H | 9.04676 | 18.6079 | 24.9508 |
| H | 18.5476 | 2.85189 | 18.1459 |

\*

## Example python script for ANN regression

```

import sys
import numpy as np
import pandas
import math
from keras.models import Sequential
from keras.optimizers import SGD
from keras.layers import Dense
from keras.layers import Activation
from keras.layers import Dropout
from keras.layers.normalization import BatchNormalization
from keras.wrappers.scikit_learn import KerasRegressor
from keras.constraints import maxnorm
from sklearn.model_selection import cross_val_score
from sklearn.model_selection import KFold
from sklearn.preprocessing import StandardScaler
from sklearn import preprocessing
from sklearn import cross_validation
from sklearn.pipeline import Pipeline
import matplotlib.pyplot as plt
from sklearn.metrics import mean_squared_error, r2_score, explained_variance_score
from sklearn.linear_model import LinearRegression
from pandas.tools.plotting import scatter_matrix
from keras.callbacks import EarlyStopping
from keras.callbacks import ModelCheckpoint

def write_2col(arrx, arry, filename):

```

```

with open(filename,'w') as f:
    for i in range(len(arrx)):
        f.write("{} \t {} \n".format(arrx[i],arry[i]))

#load dataset
path = '/home/jackson/ML/P3MT/datasets/'

df300 = pandas.read_csv(path+"P3MT_dih_HOMO_300K_flex_CG4_dist.csv", delim_whitespace=True, header=None)

ds300 = df300.values

#split into input(X) and output(Y) variables

X300 = ds300[:, :-6]
Y300 = ds300[:, -6:]

Xuse = X300
Yuse = Y300
in_dim = len(Xuse[0])

#define base neural net model
def baseline_model():
    model = Sequential()
    model.add(Dense(50, input_dim=in_dim, kernel_initializer='he_normal', kernel_constraint=maxnorm(3)))
    model.add(BatchNormalization())
    model.add(Activation('elu'))
    model.add(Dense(50, kernel_initializer='he_normal', kernel_constraint=maxnorm(3)))
    model.add(BatchNormalization())
    model.add(Activation('elu'))
    model.add(Dense(50, kernel_initializer='he_normal', kernel_constraint=maxnorm(3)))
    model.add(BatchNormalization())
    model.add(Activation('elu'))
    model.add(Dense(6, kernel_initializer='he_normal'))
    #If you want to load in a previous model, you can do it here before compiling
    #model.load_weights('weights.best.hdf5')
    #Compile model
    model.compile(loss='mean_squared_error', optimizer='Nadam', metrics=['mean_squared_error'])
    return model

seed = 434256
np.random.seed(seed)

MAE_val_list = []
R2_val_list = []
ind_list = []
ind_MAE_list = []
ind_std_list = []
ind_R2_list = []
ind_R2_std_list = []

RMSE = []
r2 = []
RMSE_train = []
r2_train = []

kfold = KFold(n_splits=5, shuffle=True, random_state=np.random.randint(1,1000000))

for train,test in kfold.split(Xuse,Yuse):
    model = baseline_model()
    X_scaler = preprocessing.StandardScaler()
    x_scaled = X_scaler.fit_transform(Xuse[train])
    Y_scaler = preprocessing.StandardScaler()
    y_scaled = Y_scaler.fit_transform(Yuse[train])
    model.fit(x_scaled,y_scaled, nb_epoch=2000, batch_size=1000, verbose=0)
    predicted_train = model.predict(X_scaler.transform(Xuse[train]))
    predicted_train = Y_scaler.inverse_transform(predicted_train)
    predicted_val = model.predict(X_scaler.transform(Xuse[test]))
    predicted_val = Y_scaler.inverse_transform(predicted_val)
    RMSE.append(math.sqrt(mean_squared_error(Yuse[test],predicted_val)))
    r2.append(r2_score(Yuse[test],predicted_val))
    RMSE_train.append(math.sqrt(mean_squared_error(Yuse[train],predicted_train)))
    r2_train.append(r2_score(Yuse[train],predicted_train))

print(model.summary())

```

```
print('5-fold train RMSE:',RMSE_train,np.mean(RMSE_train),np.std(RMSE_train))
print('5-fold train r2:',r2_train,np.mean(r2_train),np.std(r2_train))
print('5-fold cross-val RMSE:',RMSE,np.mean(RMSE),np.std(RMSE))
print('5-fold cross-val r2:',r2,np.mean(r2),np.std(r2))
```
